# Supplementary material
Source: PubMed Central journal article supplement (PMC8329126)
Supplement: NIHMS1687787-supplement-supplemental_tables.pdf [file NIHMS1687787-supplement-supplemental_tables.pdf]

**Supplementary Tables for “Topical Timolol 0.5% Gel-Forming Solution for Erythema in Rosacea: A Quantitative, Split-Face, Randomized, and Rater-Masked Pilot Clinical Trial”**

**Table S1.** Participant demographics and characteristics (n=8)

| <b>Participant No.</b> | <b>Age, y</b> | <b>Gender</b> | <b>Fitzpatrick Skin Type</b> | <b>Baseline Clinical Grade</b> | <b>Baseline Colorimeter a* <sup>1</sup></b> | <b>Baseline CAIA a* <sup>1,2</sup></b> |
|------------------------|---------------|---------------|------------------------------|--------------------------------|---------------------------------------------|----------------------------------------|
| 02                     | 62            | Male          | 1                            | Mild                           | 22.4                                        | 150.5                                  |
| 03                     | 54            | Female        | 2                            | Mild                           | 18.4                                        | 141.0                                  |
| 04                     | 45            | Female        | 1                            | Mild-Moderate                  | 27.0                                        | 154.7                                  |
| 05                     | 28            | Female        | 2                            | Mild                           | 23.7                                        | 138.4                                  |
| 06                     | 50            | Female        | 4                            | Mild                           | 24.1                                        | 152.5                                  |
| 07                     | 54            | Female        | 2                            | Mild                           | 26.0                                        | 155.0                                  |
| 08                     | 63            | Male          | 1                            | Moderate                       | 29.0                                        | 171.8                                  |
| 09                     | 47            | Female        | 3                            | Mild                           | 19.0                                        | 142.8                                  |

<sup>1</sup>Average of both sides of the face

<sup>2</sup>CAIA, computer-aided image analysis

**Table S2.** Results from mixed-effects models: change in facial erythema (a\*) at each timepoint relative to baseline across all participants

| <b>Colorimeter a*</b>           |                       |                |                  |                                     |                         |                               |                |                |                                     |                         |
|---------------------------------|-----------------------|----------------|------------------|-------------------------------------|-------------------------|-------------------------------|----------------|----------------|-------------------------------------|-------------------------|
| <b>Treated Baseline-Week 16</b> |                       |                |                  |                                     |                         | <b>Treated Week 8-Week 16</b> |                |                |                                     |                         |
| <i>Timepoint<sup>1</sup></i>    | <i>Change from BL</i> | <i>95 % CI</i> | <i>P value</i>   | <i>adjusted P value<sup>2</sup></i> | <i>% Change from BL</i> | <i>Change from BL</i>         | <i>95 % CI</i> | <i>P value</i> | <i>adjusted P value<sup>2</sup></i> | <i>% Change from BL</i> |
| BL                              | Ref.                  |                |                  |                                     |                         | Ref.                          |                |                |                                     |                         |
| W4                              | -1.48                 | -3.37 – 0.42   | 0.139            | 0.209                               | -6.30%                  | -0.96                         | -3.21 – 1.29   | 0.410          | 0.468                               | -4.00%                  |
| W8                              | -1.50                 | -3.61 – 0.62   | 0.176            | 0.249                               | -6.40%                  | -1.45                         | -3.96 – 1.05   | 0.266          | 0.319                               | -6.00%                  |
| W12                             | -4.68                 | -6.80 – -2.57  | <b>&lt;0.001</b> | <b>0.001</b>                        | -20.00%                 | -3.18                         | -5.69 – -0.68  | <b>0.019</b>   | 0.057                               | -13.30%                 |
| W16                             | -2.96                 | -5.07 – -0.84  | <b>0.011</b>     | <b>0.043</b>                        | -12.60%                 | -2.93                         | -5.44 – -0.43  | <b>0.029</b>   | 0.060                               | -12.20%                 |
| W20                             | -1.42                 | -3.53 – 0.70   | 0.199            | 0.251                               | -6.10%                  | -1.02                         | -3.53 – 1.48   | 0.429          | 0.468                               | -4.30%                  |

  

| <b>Computer-aided image analysis (CAIA) a*</b> |                       |                |                |                                     |                                     |                               |                |                |                                     |                                     |
|------------------------------------------------|-----------------------|----------------|----------------|-------------------------------------|-------------------------------------|-------------------------------|----------------|----------------|-------------------------------------|-------------------------------------|
| <b>Treated Baseline-Week 16</b>                |                       |                |                |                                     |                                     | <b>Treated Week 8-Week 16</b> |                |                |                                     |                                     |
| <i>Timepoint<sup>1</sup></i>                   | <i>Change from BL</i> | <i>95 % CI</i> | <i>P value</i> | <i>adjusted P value<sup>2</sup></i> | <i>% Change from BL<sup>3</sup></i> | <i>Change from BL</i>         | <i>95 % CI</i> | <i>P value</i> | <i>adjusted P value<sup>2</sup></i> | <i>% Change from BL<sup>3</sup></i> |
| BL                                             | Ref.                  |                |                |                                     |                                     | Ref.                          |                |                |                                     |                                     |
| W4                                             | -1.24                 | -4.48 – 2.00   | 0.459          | 0.479                               | -5.30%                              | -0.40                         | -4.03 – 3.23   | 0.831          | 0.831                               | -1.80%                              |
| W8                                             | -3.48                 | -7.10 – 0.13   | 0.069          | 0.119                               | -15.00%                             | -2.72                         | -6.77 – 1.32   | 0.197          | 0.251                               | -12.10%                             |
| W12                                            | -4.85                 | -8.47 – -1.24  | <b>0.014</b>   | <b>0.047</b>                        | -20.90%                             | -4.86                         | -8.90 – -0.82  | <b>0.026</b>   | 0.060                               | -21.60%                             |
| W16                                            | -4.23                 | -7.84 – -0.61  | <b>0.030</b>   | 0.060                               | -18.20%                             | -4.56                         | -8.61 – -0.52  | <b>0.035</b>   | 0.065                               | -20.30%                             |
| W20                                            | -4.49                 | -8.10 – -0.87  | <b>0.022</b>   | 0.058                               | -19.30%                             | -3.58                         | -7.62 – 0.47   | 0.094          | 0.150                               | -15.90%                             |

<sup>1</sup>BL, baseline; W4, week 4; W8, week 8; W12, week 12; W16, week 16; W20, week 20

<sup>2</sup>P values adjusted with Benjamini-Hochberg correction for multiple comparisons

<sup>3</sup>Since positive values of CAIA-measured a\* cover both green (0-128) and red (129-255) gradients, percent change in erythema was calculated by subtracting 128 from baseline CAIA-measured a\* to isolate the red component, then dividing it from change in CAIA-measured a\* at each timepoint.
